# Supplementary material for: Transcriptomic and metabolomic joint analysis reveals distinct flavonoid biosynthesis regulation for variegated testa color development in peanut (Arachis hypogaea L.)
Source: Research Square preprint supplement (doi:10.21203/rs.3.rs-119186/v1), 2020-12-01
Supplement: Supplementary file 1 [file 613d96ba4dc729976b733f29.xlsx]

## Sheet: Table S5
Transcriptomic and metabolomic joint analysis reveals distinct flavonoid biosynthesis regulation for variegated testa color development in peanut (Arachis hypogaea L.)
Mengdie Hu1,Jiawei Li1, Mingyu Hou1,Xiaoqing Liu1,Shunli Cui1,Xinlei Yang1,Lifeng Liu1,Xiaoxia Jiang2, Guojun Mu1*
Table S5. GO enrichment results in transcriptome analysis
#GO_classify1	GO_classify2	F1_vs_B1	F2_vs_B2	B1_vs_B2	F1_vs_F2
cellular component	membrane	32	63	18	18
cellular component	cell	33	47	17	21
cellular component	cell part	33	47	17	21
cellular component	membrane part	18	43	7	10
cellular component	organelle	21	31	6	14
cellular component	macromolecular complex	6	7	5	7
cellular component	organelle part	5	6	2	5
cellular component	extracellular region	1	5	0	2
cellular component	cell junction	0	2	1	0
cellular component	symplast	0	2	1	0
cellular component	membrane-enclosed lumen	1	0	0	1
cellular component	extracellular region part	0	0	0	1
cellular component	supramolecular complex	1	0	0	0
molecular function	catalytic activity	83	130	45	58
molecular function	binding	53	102	35	39
molecular function	transporter activity	10	20	4	5
molecular function	electron carrier activity	3	5	2	8
molecular function	nucleic acid binding transcription factor activity	3	7	2	2
molecular function	molecular function regulator	2	2	3	2
molecular function	signal transducer activity	0	1	2	1
molecular function	antioxidant activity	2	1	1	0
molecular function	structural molecule activity	2	0	0	1
molecular function	nutrient reservoir activity	0	2	0	0
molecular function	molecular transducer activity	0	0	1	0
biological process	metabolic process	80	109	41	55
biological process	single-organism process	57	86	28	37
biological process	cellular process	52	70	29	33
biological process	localization	14	35	8	11
biological process	response to stimulus	21	25	10	9
biological process	biological regulation	14	27	11	12
biological process	cellular component organization or biogenesis	14	18	5	4
biological process	developmental process	7	12	4	3
biological process	multicellular organismal process	7	12	4	2
biological process	signaling	6	6	4	2
biological process	multi-organism process	6	6	1	0
biological process	reproduction	1	6	3	0
biological process	reproductive process	1	6	3	0
biological process	detoxification	2	1	2	0
biological process	biological adhesion	1	1	1	1
biological process	immune system process	2	1	0	0
biological process	growth	1	1	1	0
